# Supplementary material for: Mechanistic insights into the regio- and stereoselectivity of [3+2] cycloaddition reactions between N-methyl-phenylnitrone and trans-1-chloro-2-nitroethylene within the framework of molecular electron density theory
Source: Royal Society of Chemistry journal article supplement (doi:10.1039/d5nj01419k), 2025-01-01
Supplement: d5nj01419k1.pdf [file d5nj01419k1.pdf]

**“Supporting Information”**

**Mechanistic Insights into the Regio- and Stereoselectivity of [3+2] Cycloaddition Reactions between N-methyl-phenylnitrone and trans-1-chloro-2-nitroethylene within the Framework of Molecular Electron Density Theory**

Sofiane Benmetir<sup>ab</sup>, Mohamed Chellegui<sup>\*cd</sup>, Lakhdar Benhamed<sup>e</sup>, Raghad Mowafak Al-Mokhtar<sup>f</sup>, Raad Nasrullah Salih<sup>g</sup>, Muheb Amjad Algho<sup>h</sup>, Jesus Vicente de Julián-Ortiz<sup>a</sup> and Haydar A. Mohammad-Salim<sup>ij</sup>

<sup>a</sup> *Department of Physical Chemistry, Faculty of Pharmacy, University of Valencia, Av. Vicente Andrés Estellés s/n, 46100 Valencia, Spain*

<sup>b</sup> *Process and Environmental Engineering Laboratory (LIPE), Faculty of Chemistry, University of Science and Technology of Oran Mohamed BOUDIAF, P.O. Box 1503, El Mnaouer, 31000 Oran, Algeria*

<sup>c</sup> *Laboratory of Organic Chemistry (LR17ES08), Faculty of Sciences, University of Sfax, 3038 Sfax, Tunisia*

<sup>d</sup> *Namur Institute of Structured Matter, University of Namur, Rue de Bruxelles, 61, B-5000 Namur, Belgium*

<sup>e</sup> *Laboratory of Applied Thermodynamics and Molecular Modelling, Department of Chemistry, Faculty of Sciences, Abou-Bekr Belkaid University, PO 119, Tlemcen, 13000, Algeria.*

<sup>f</sup> *Department of Chemistry, College of Science, University of Duhok, Duhok 42001, Kurdistan Region, Iraq*

<sup>g</sup> *Nursing Department, Bardarash Technical Institute, Akre University for Applied science, Duhok 42001, Kurdistan Region, Iraq*

<sup>h</sup> *Department of Chemistry, College of Science, University of Duhok, Duhok 42001, Kurdistan Region, Iraq*

<sup>i</sup> *Department of Chemistry, Faculty of Science, University of Zakho, Zakho 42002, Kurdistan Region, Iraq*

<sup>j</sup> *TCCG Lab, Scientific Research Center, University of Zakho, Zakho 42002, Kurdistan Region, Iraq*

In this study, the 32CA reactions between both the Z- and E-isomers of N-methyl-phenylnitron 1 and trans-1-chloro-2-nitroethylene 2 were investigated using density functional theory (DFT) calculations at the IEFPCM(benzene)/B3LYP/6-311G(d,p) level of theory. The reaction involving the Z-isomer of nitron 1 is illustrated in **Scheme S1**, while that with the E-isomer is shown in **Scheme S2**.

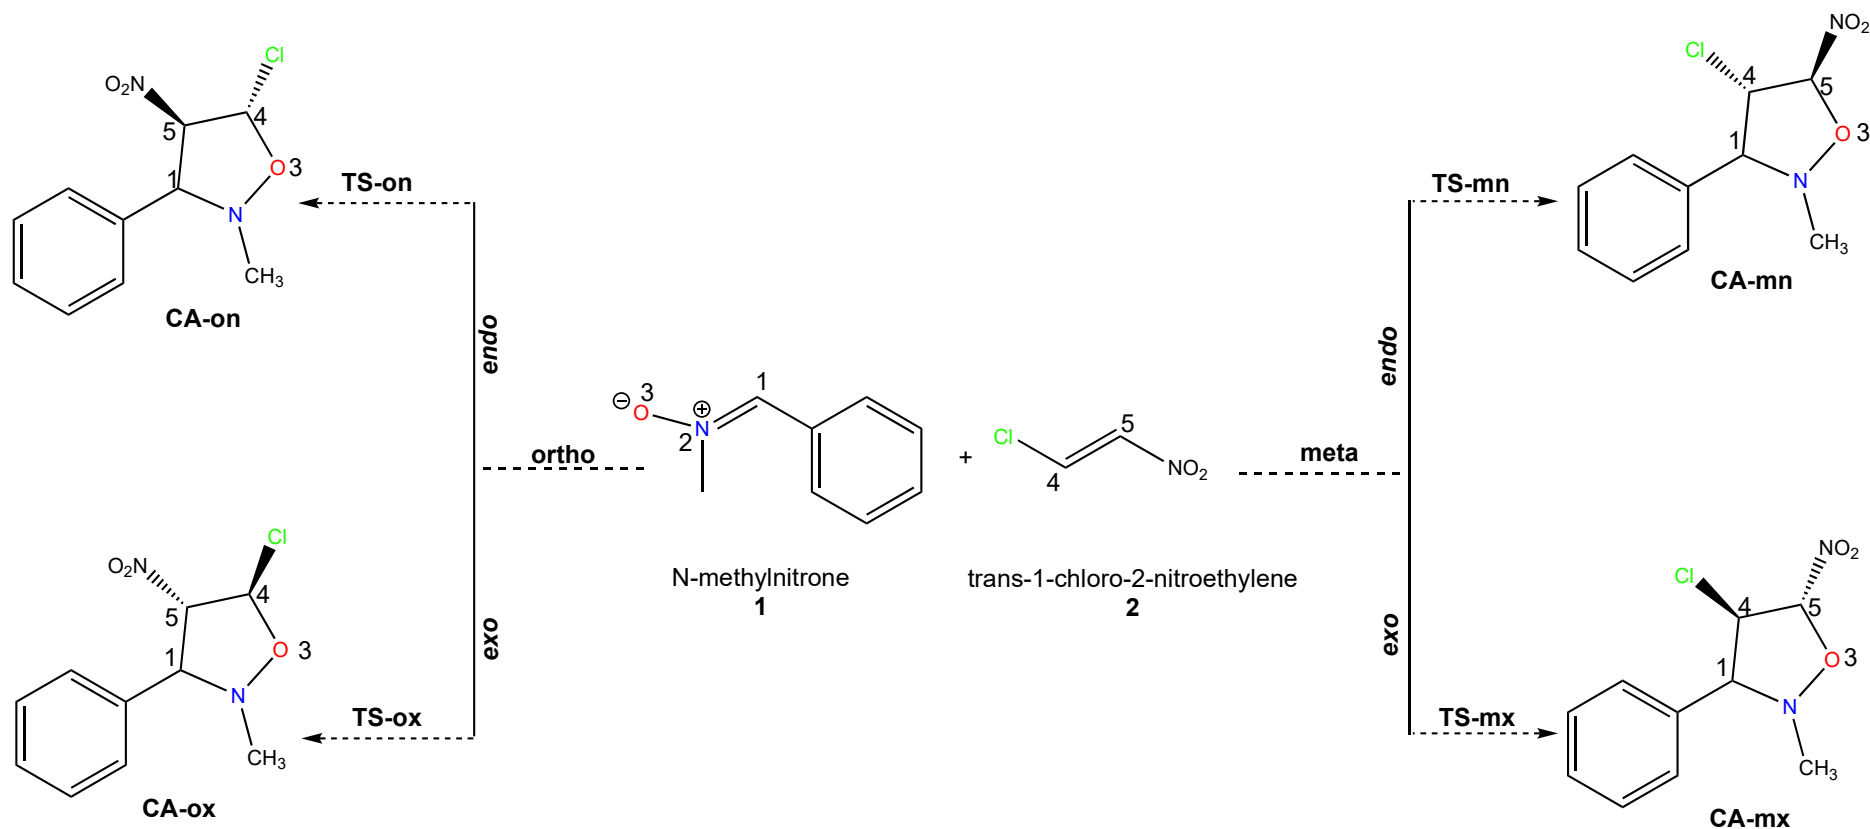

**Scheme S1.** Possible regio- and stereoisomeric pathways for the 32CA reaction between Z-isomer of N-methyl-phenylnitron 1 and trans-1-chloro-2-nitroethylene 2 leading to the formation of cycloadducts.

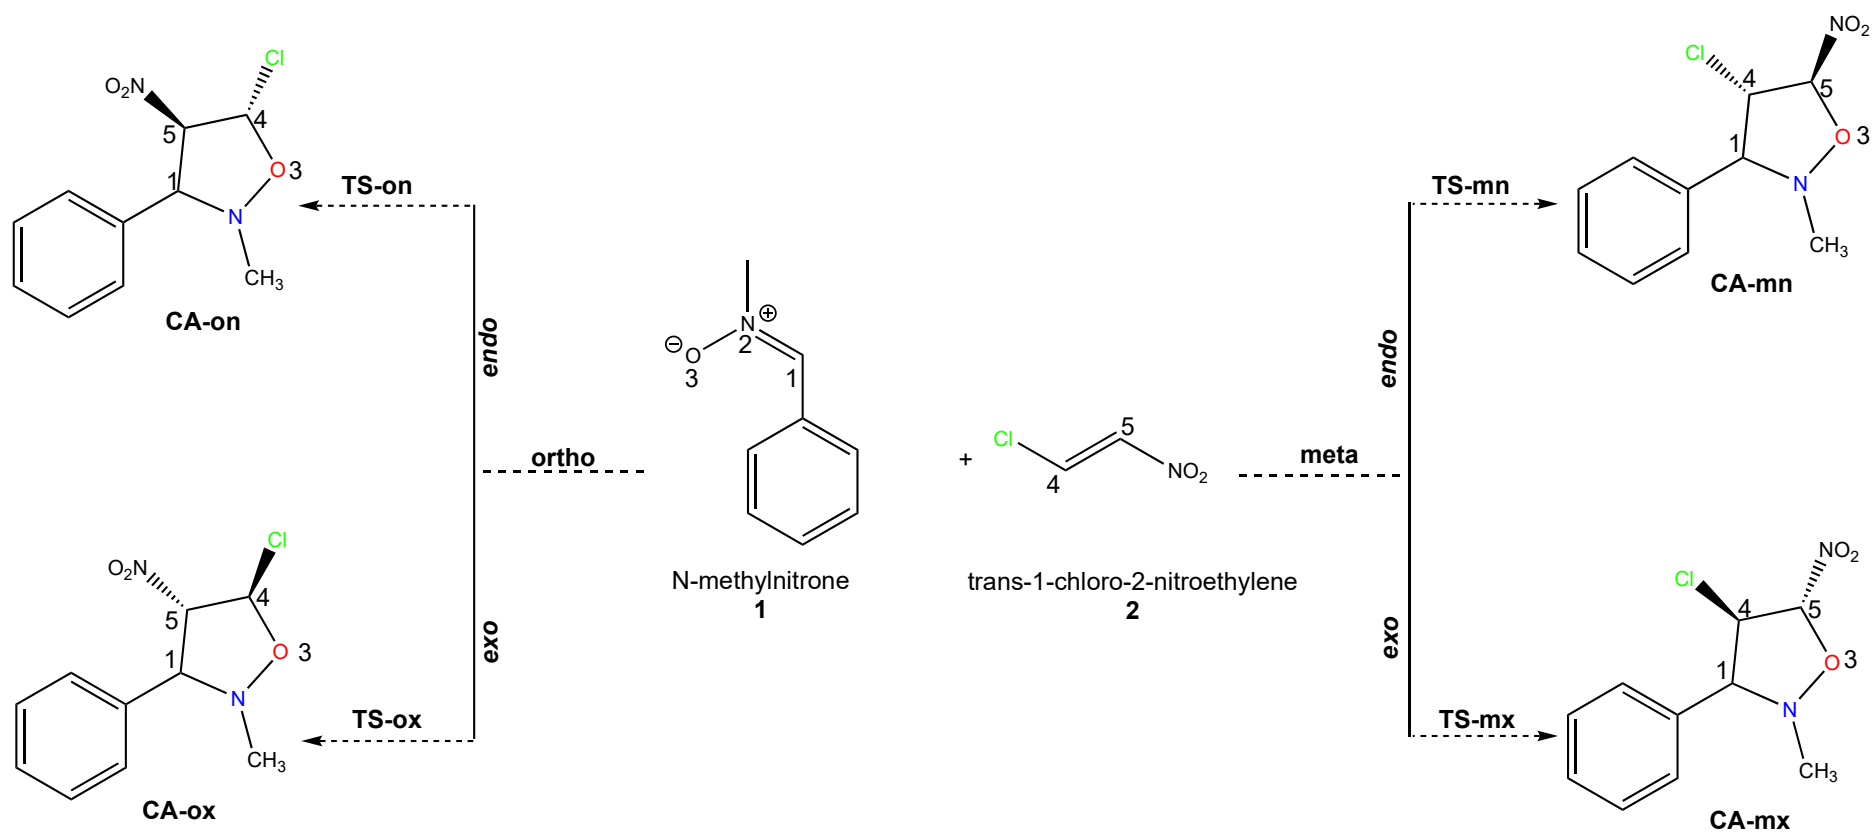

**Scheme S2.** Possible regio- and stereoisomeric pathways for the 32CA reaction between E-isomer of N-methyl-phenylnitron 1 and trans-1-chloro-2-nitroethylene 2 leading to the formation of cycloadducts.

The relative values of energy (E), enthalpy ( $H^0$ ), entropy ( $S^0$ ) and Gibbs enthalpy ( $G^0$ ) of the reactants, products, and calculated at different levels of theory are given in Table S1.

**Table S1** Energies, enthalpies, entropies, and Gibbs enthalpies of reactants, transition states, and products calculated at different levels of theory.

Solvent (benzene) effects were described using IEFPCM.

| Systems                  | E (a.u.)       | $H^0$ (a.u.) | $S^0$ (cal mol <sup>-1</sup> K <sup>-1</sup> ) | $G^0$ (a.u.) |
|--------------------------|----------------|--------------|------------------------------------------------|--------------|
| <b>B3LYP/6-311G(d,p)</b> |                |              |                                                |              |
| <b>1-Z</b>               | -440.287244    | -440.123006  | 92.126                                         | -440.166778  |
| <b>2</b>                 | -742.790695    | -742.738231  | 78.183                                         | -742.775378  |
| <b>CA-on</b>             | -1183.110444   | -1182.889267 | 121.399                                        | -1182.946948 |
| <b>CA-ox</b>             | -1183.11389172 | -1182.893149 | 122.663                                        | -1182.951430 |
| <b>CA-mn</b>             | -1183.102561   | -1182.881634 | 121.670                                        | -1182.939443 |
| <b>CA-mx</b>             | -1183.10719523 | -1182.886132 | 123.695                                        | -1182.944904 |
| <b>TS-on</b>             | -1183.066935   | -1182.848840 | 125.260                                        | -1182.908355 |
| <b>TS-ox</b>             | -1183.06950818 | -1182.851448 | 121.489                                        | -1182.904770 |
| <b>TS-mn</b>             | -1183.059235   | -1182.841145 | 122.124                                        | -1182.909171 |
| <b>TS-mx</b>             | -1183.05924027 | -1182.841320 | 124.315                                        | -1182.900386 |
| <b>B3LYP/6-311G(d,p)</b> |                |              |                                                |              |
| <b>1-E</b>               | -440.298019    | -440.133627  | 91.956                                         | -440.177318  |
| <b>CA-on</b>             | -1183.110392   | -1182.889594 | 122.025                                        | -1182.947572 |
| <b>CA-ox</b>             | -1183.117759   | -1182.896816 | 123.888                                        | -1182.955680 |
| <b>CA-mn</b>             | -1183.116661   | -1182.895738 | 122.793                                        | -1182.954081 |
| <b>CA-mx</b>             | -1183.107195   | -1182.886132 | 123.695                                        | -1182.944904 |
| <b>TS-on</b>             | -1183.063701   | -1182.846111 | 123.397                                        | -1182.904741 |
| <b>TS-ox</b>             | -1183.069508   | -1182.851441 | 121.407                                        | -1182.909126 |
| <b>TS-mn</b>             | -1183.057213   | -1182.839547 | 123.602                                        | -1182.898274 |
| <b>TS-mx</b>             | -1183.054652   | -1182.836989 | 124.265                                        | -1182.896032 |
| <b>M062X/6-311G(d,p)</b> |                |              |                                                |              |
| <b>1-Z</b>               | -440.088443    | -439.922363  | 91.144                                         | -439.965668  |
| <b>2</b>                 | -742.642536    | -742.589050  | 77.926                                         | -742.626075  |
| <b>CA-on</b>             | -1182.794974   | -1182.570612 | 118.806                                        | -1182.627060 |

|                            |              |              |         |              |
|----------------------------|--------------|--------------|---------|--------------|
| <b>CA-ox</b>               | -1182.797514 | -1182.573649 | 121.103 | -1182.631189 |
| <b>CA-mn</b>               | -1182.787193 | -1182.562852 | 119.326 | -1182.619548 |
| <b>CA-mx</b>               | -1182.794078 | -1182.569802 | 119.540 | -1182.626599 |
| <b>TS-on</b>               | -1182.734593 | -1182.513680 | 124.406 | -1182.572789 |
| <b>TS-ox</b>               | -1182.741683 | -1182.520929 | 120.939 | -1182.578391 |
| <b>TS-mn</b>               | -1182.728177 | -1182.506944 | 120.117 | -1182.564016 |
| <b>TS-mx</b>               | -1182.736220 | -1182.515921 | 121.064 | -1182.573442 |
| <b>ωB97X-D/6-311G(d,p)</b> |              |              |         |              |
| <b>1-Z</b>                 | -440.127914  | -439.961968  | 91.383  | -440.005387  |
| <b>2</b>                   | -742.673370  | -742.620126  | 78.059  | -742.657214  |
| <b>CA-on</b>               | -1182.860341 | -1182.636231 | 119.757 | -1182.693131 |
| <b>CA-ox</b>               | -1182.862343 | -1182.638631 | 120.618 | -1182.695941 |
| <b>CA-mn</b>               | -1182.851701 | -1182.627905 | 120.369 | -1182.685096 |
| <b>CA-mx</b>               | -1182.858389 | -1182.634412 | 120.287 | -1182.691565 |
| <b>TS-on</b>               | -1182.800712 | -1182.579850 | 123.880 | -1182.638710 |
| <b>TS-ox</b>               | -1182.806163 | -1182.585452 | 120.391 | -1182.642654 |
| <b>TS-mn</b>               | -1182.795018 | -1182.574157 | 120.514 | -1182.631417 |
| <b>TS-mx</b>               | -1182.795013 | -1182.574327 | 122.787 | -1182.632667 |

**Table S2** Relative energies ( $\Delta E$ ) and Gibbs free energies ( $\Delta G$ ), in kcal mol<sup>-1</sup>, for TSs and cycloadducts involved in the 32CA between N-methylphenylnitrone **1** and trans-1-chloro-2-nitroethylene **2**, in benzene at room temperature calculated at different levels of theory. The electronic and steric contributions,  $\Delta H$  and  $-\Delta S$ , respectively, are included.

| $\Delta E$                | $\Delta H$ | $-\Delta S$ | $\Delta G$ |
|---------------------------|------------|-------------|------------|
| <b>M06-2X/6-311G(d,p)</b> |            |             |            |

|                                              |        |        |       |        |
|----------------------------------------------|--------|--------|-------|--------|
| <b>TS-on</b>                                 | -6.72  | -5.97  | 14.35 | 8.38   |
| <b>TS-ox</b>                                 | -2.27  | -1.42  | 13.32 | 11.89  |
| <b>TS-mn</b>                                 | 1.76   | 2.80   | 14.59 | 17.40  |
| <b>TS-mx</b>                                 | 1.76   | 2.80   | 14.59 | 17.40  |
| <b>CA-on</b>                                 | -41.75 | -39.05 | 14.30 | -24.75 |
| <b>CA-ox</b>                                 | -40.16 | -37.15 | 14.99 | -22.16 |
| <b>CA-mn</b>                                 | -35.27 | -32.28 | 14.83 | -17.45 |
| <b>CA-mx</b>                                 | -35.27 | -32.28 | 14.83 | -17.45 |
| <b><math>\omega</math>B97X-D/6-311G(d,p)</b> |        |        |       |        |
| <b>TS-on</b>                                 | -3.06  | -2.11  | 0.00  | 12.52  |
| <b>TS-ox</b>                                 | 0.36   | 1.41   | -1.04 | 14.99  |
| <b>TS-mn</b>                                 | 3.93   | 4.98   | 14.59 | 19.57  |
| <b>TS-mx</b>                                 | 3.93   | 4.98   | -0.04 | 19.57  |
| <b>CA-on</b>                                 | -38.32 | -35.48 | 0.00  | -20.92 |
| <b>CA-ox</b>                                 | -37.06 | -33.97 | 0.26  | -19.16 |
| <b>CA-mn</b>                                 | -31.64 | -28.75 | 14.63 | -14.12 |
| <b>CA-mx</b>                                 | -31.64 | -28.75 | 0.07  | -14.12 |

**Table S3** B3LYP/6-311G(d,p) relative energy, enthalpy and Gibbs free energy (kcal mol<sup>-1</sup>) of Z-isomer comparing to E-isomer of N-methyl-phenylnitron **1** in benzene at room temperature.

| <b>Isomer</b> | <b><math>\Delta E</math></b> | <b><math>\Delta H</math></b> | <b><math>\Delta G</math></b> |
|---------------|------------------------------|------------------------------|------------------------------|
| <b>E</b>      | 0.00                         | 0.00                         | 0.00                         |
| <b>Z</b>      | 6.76                         | 6.66                         | 6.61                         |

**Table S4** B3LYP/6-311G(d,p) relative energies ( $\Delta E$ , in kcal mol<sup>-1</sup>), enthalpies ( $\Delta H$ , in kcal mol<sup>-1</sup>), entropies ( $\Delta S$ , in calmol<sup>-1</sup> K<sup>-1</sup>) and Gibbs free energies ( $\Delta G$ , in kcal mol<sup>-1</sup>), for TSs and cycloadducts involved in the 32CA between E-N-methyl-phenylnitron **1** and trans-1-chloro-2-nitroethylene **2**, in benzene.

|              | $\Delta E$ | $\Delta H$ | $T\Delta S(-)$ | $\Delta G$ |
|--------------|------------|------------|----------------|------------|
| <b>TS-ox</b> | 15.70      | 16.16      | 13.94          | 30.09      |
| <b>TS-on</b> | 14.66      | 15.27      | 13.89          | 29.16      |
| <b>TS-mx</b> | 19.77      | 20.28      | 13.87          | 34.15      |
| <b>TS-mn</b> | 21.37      | 21.88      | 13.68          | 35.56      |
| <b>CA-ox</b> | -13.63     | -10.92     | 14.53          | 3.61       |
| <b>CA-on</b> | -15.80     | -13.36     | 14.15          | 0.79       |
| <b>CA-mx</b> | -8.69      | -6.13      | 14.45          | 8.32       |
| <b>CA-mn</b> | -11.60     | -8.96      | 13.85          | 4.89       |

**Table S5** B3LYP/6-311G(d,p) Maxwell–Boltzmann weight (P in %) for the all the studied cycloadducts involved in the 32CA reaction between Z-N-methyl-phenylnitron **1** and trans-1-chloro-2-nitroethylene **2**, in benzene.

| Structures | CA-on | CA-ox | CA-mn | CA-mx |
|------------|-------|-------|-------|-------|
| <b>P</b>   | 99.40 | 0.58  | 0.02  | 0.00  |

**Table S6** B3LYP/6-311G(d,p) electronic and steric contributions (in %),  $\Delta H$  and  $-T\Delta S$ , to relative relative Gibbs free energies, in kcal/mol, for TSs involved in the 32CA of E-isomer and Z-isomer of N-methyl-phenylnitron **1** with trans-1-chloro-2-nitroethylene **2**, in benzene.

|              | $\Delta H$   | $-T\Delta S$ | $\Delta G$ |
|--------------|--------------|--------------|------------|
|              |              | Z-isomer     |            |
| <b>TS-ox</b> | 7.78(29.7%)  | 13.43(70.3%) | 21.21      |
| <b>TS-on</b> | 6.14(36.7%)  | 14.56(63.3%) | 20.70      |
| <b>TS-mx</b> | 12.61(47.7%) | 14.37(52.3%) | 26.97      |

|              |              |              |       |
|--------------|--------------|--------------|-------|
| <b>TS-mn</b> | 12.50(46.8%) | 13.71(53.2%) | 26.21 |
| E-isomer     |              |              |       |
| <b>TS-ox</b> | 16.16(53.7%) | 13.94(46.3%) | 30.09 |
| <b>TS-on</b> | 15.27(52.3%) | 13.89(47.6%) | 29.16 |
| <b>TS-mx</b> | 20.28(59.4%) | 13.87(40.6%) | 34.15 |
| <b>TS-mn</b> | 21.88(61.5%) | 13.68(38.5%) | 35.56 |

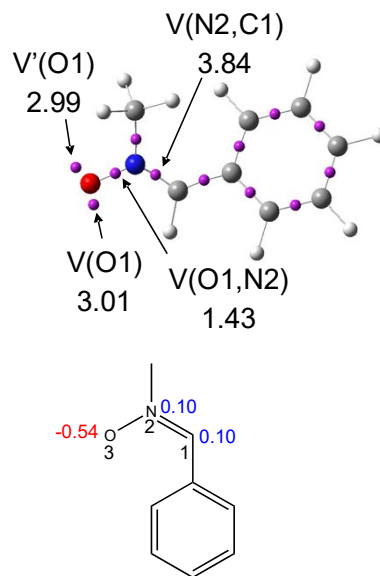

**Fig. S1** B3LYP/6–311G(d,p) calculated ELF localization domains (isosurface value of ELF = 0.80), and proposed Lewis-like structures, together with the natural atomic charges, in average number of electrons  $e$ , E-isomers of N-methyl-phenylnitron **1** in benzene at room temperature. Protonated basins are shown in blue, monosynaptic basins in red, disynaptic basins in green, and core basins in magenta colours. Negative charges are coloured in red, and positive charges in blue.



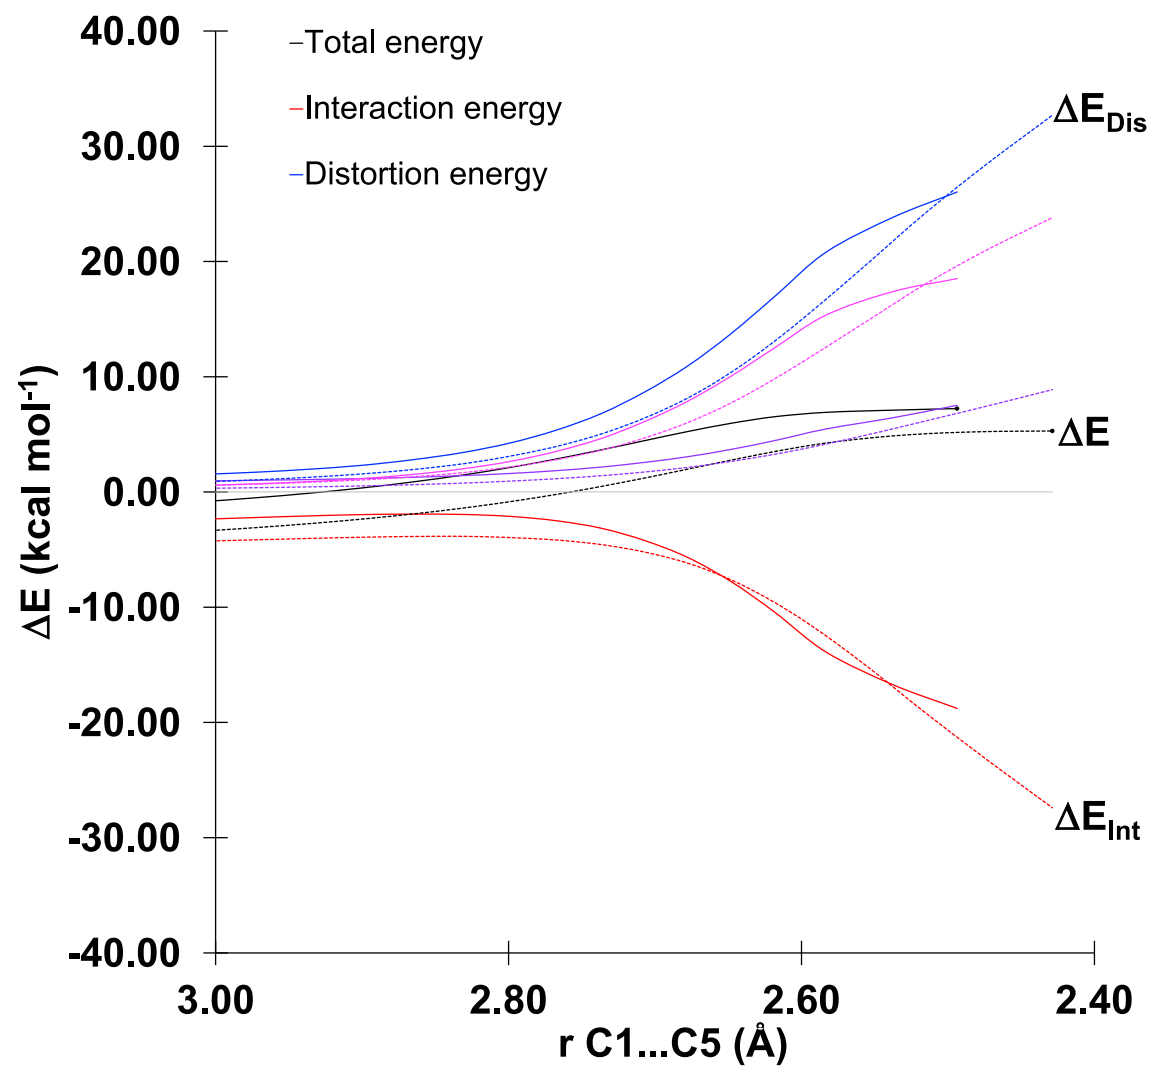

**Fig. S2** Comparative DIAS diagrams for the **TS-on** (solid lines) and **TS-ox** (dashed lines) approaches of the 32CA reaction between **1** and **2** along the reaction coordinate projected onto the forming C1...C5 (right) bond distances. The transition states are indicated by a dot.

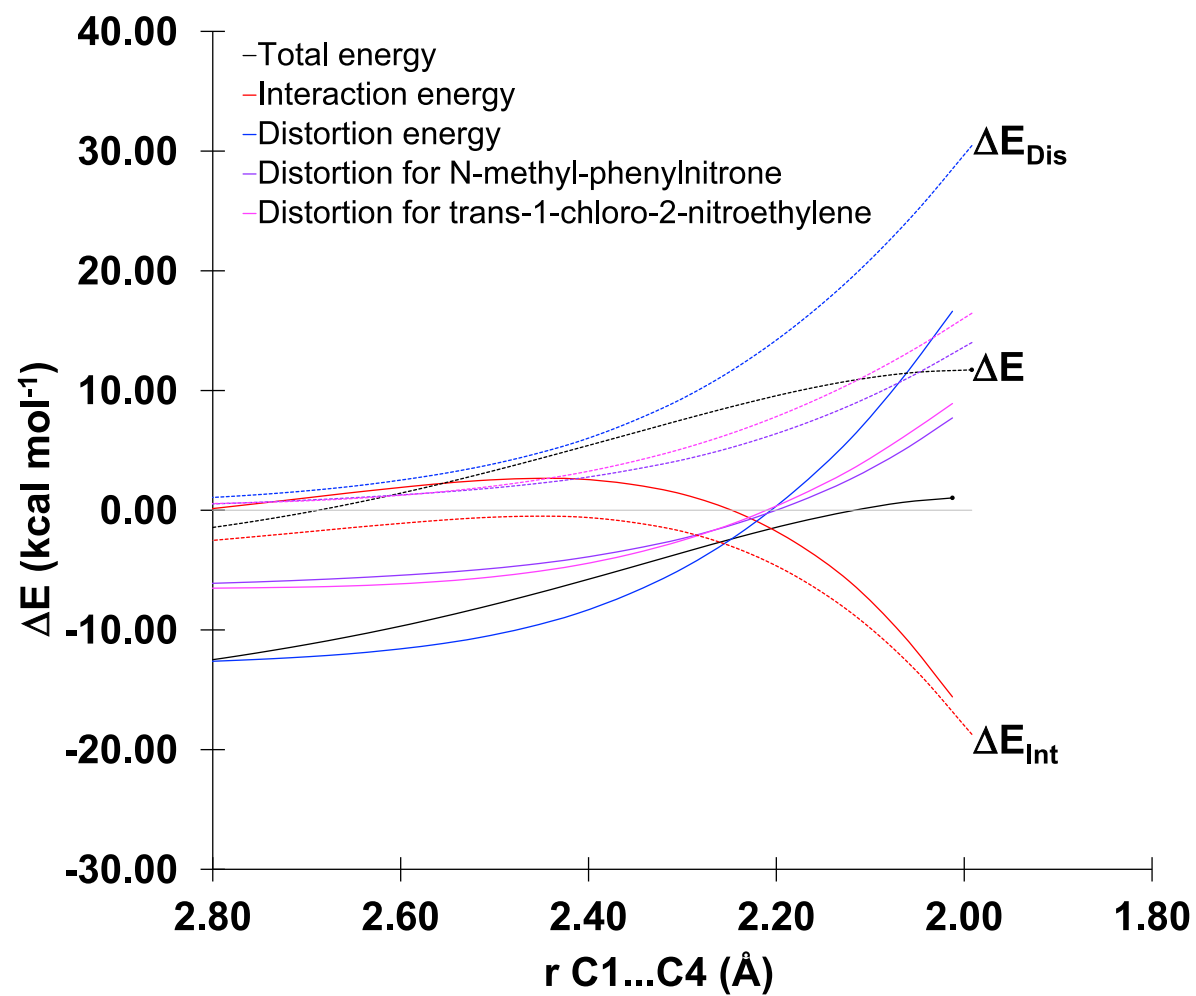

**Fig. S3** Comparative DIAS diagrams for the **TS-mn** (solid lines) and **TS-mx** (dashed lines) approaches of the 32CA reaction between **1** and **2** along the reaction coordinate projected onto the forming and C1...C4 bond distances. The transition states are indicated by a dot.

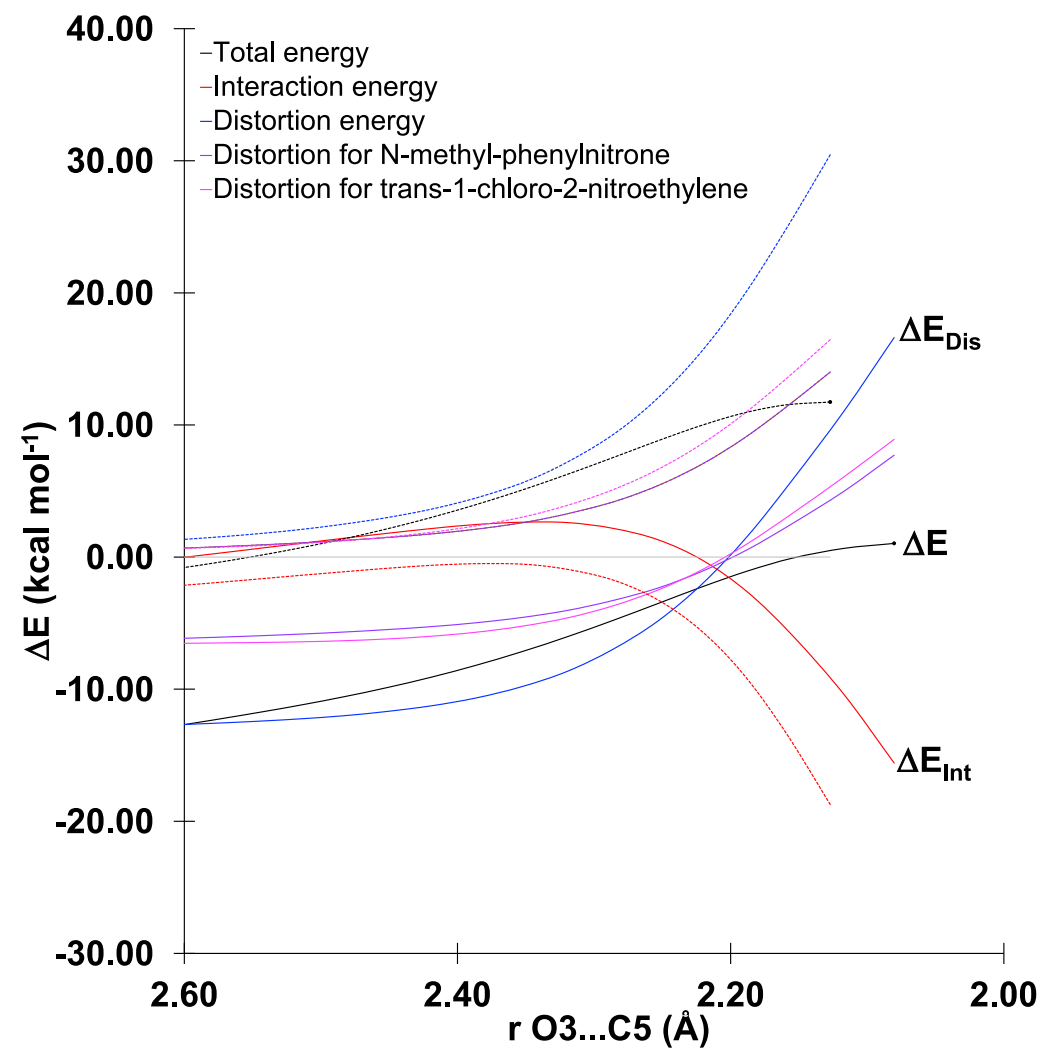

**Fig. S4** Comparative DIAS diagrams for the **TS-mn** (solid lines) and **TS-mx** (dashed lines) approaches of the 32CA reaction between **1** and **2** along the reaction coordinate projected onto the forming O3...C5 bond distances. The transition states are indicated by a dot.

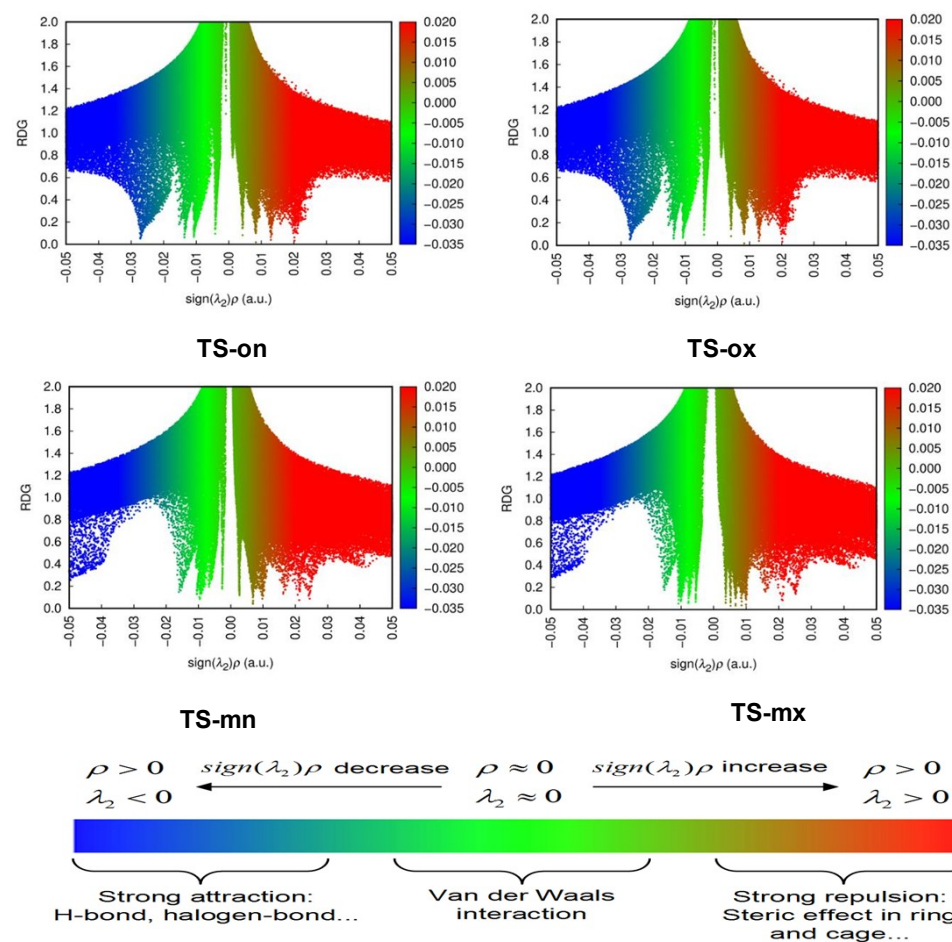

**Fig. S5** The reduced density gradient and gradient isosurfaces of the TSs involved in the 32CA reaction between N-methyl-phenylnitrene **1** and trans-1-chloro-2-nitroethylene **2**.

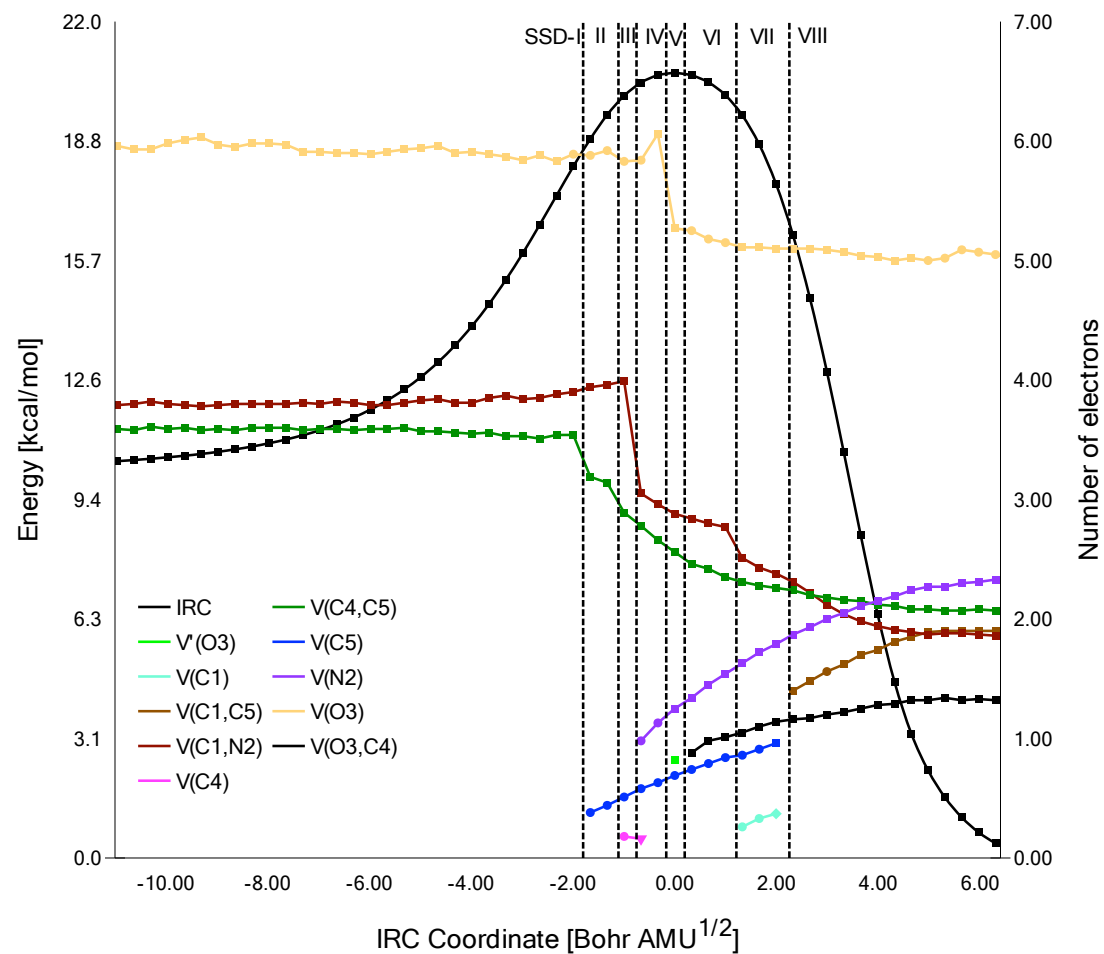

**Fig. S6** Electron populations (e) evolution for selected basins along the IRC associated with the **TS-ox** regio-isomeric channel as determined at the IEFPCM(benzene)/B3LYP/6-311G(d,p) level of approximation. These evolutions are plotted on top of the potential energy surface.

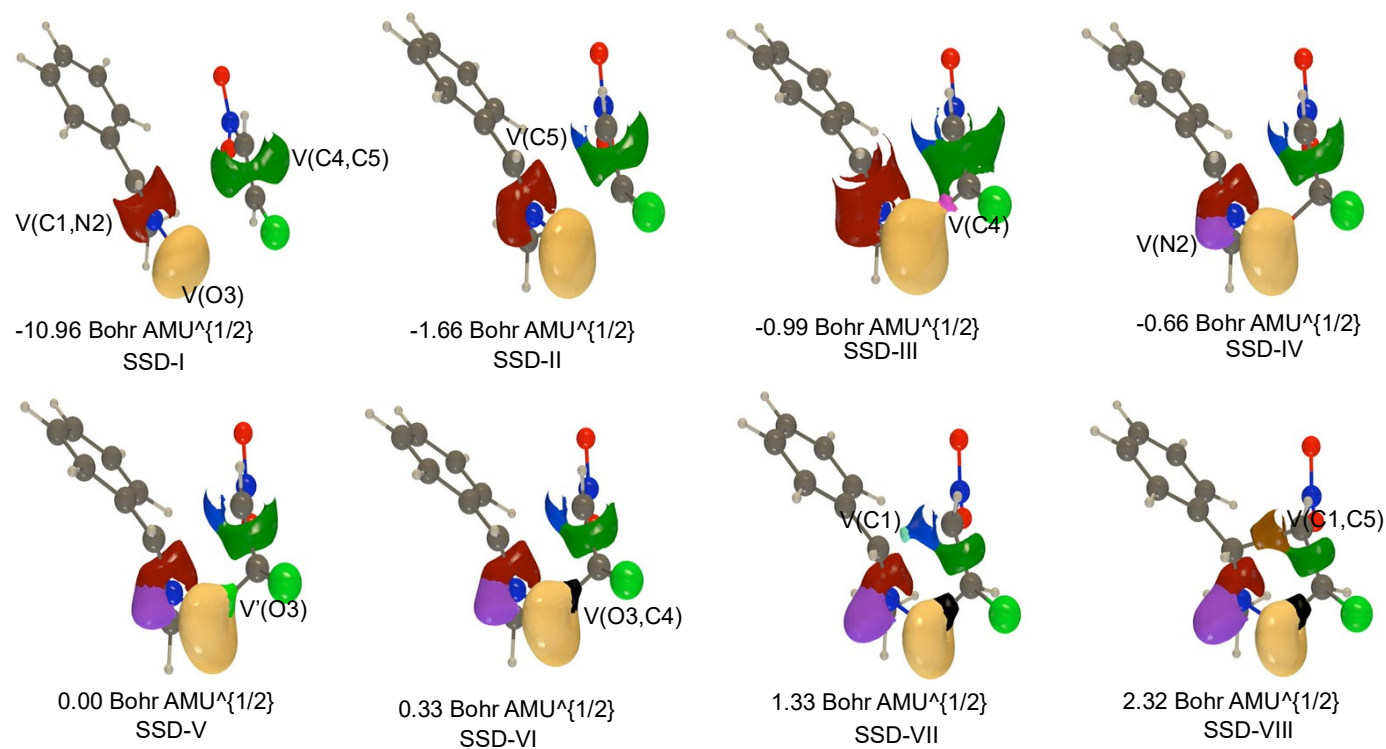

**Fig. S7** ELF basin isosurfaces ( $\eta = 0.70$ ) of each of the SSDs found along the IRC associated with **TS-ox**. Color labeling of the basins is adopted according to **Fig. S6**.

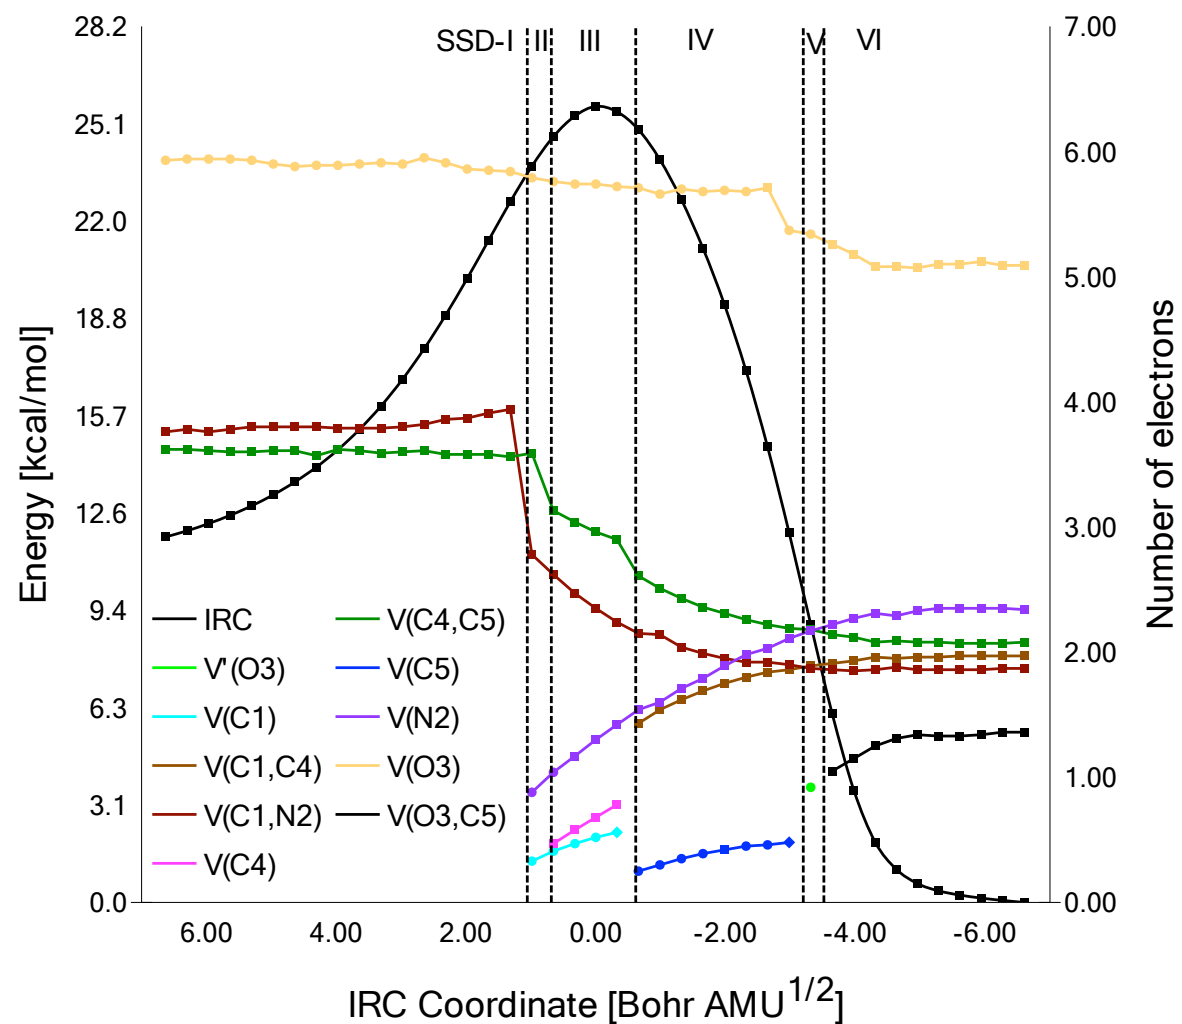

**Fig. S8** Electron populations (e) evolution for selected basins along the IRC associated with the **TS-mn** regio-isomeric channel as determined at the IEFPCM(benzene)/B3LYP/6-311G(d,p) level of approximation. These evolutions are plotted on top of the potential energy surface.

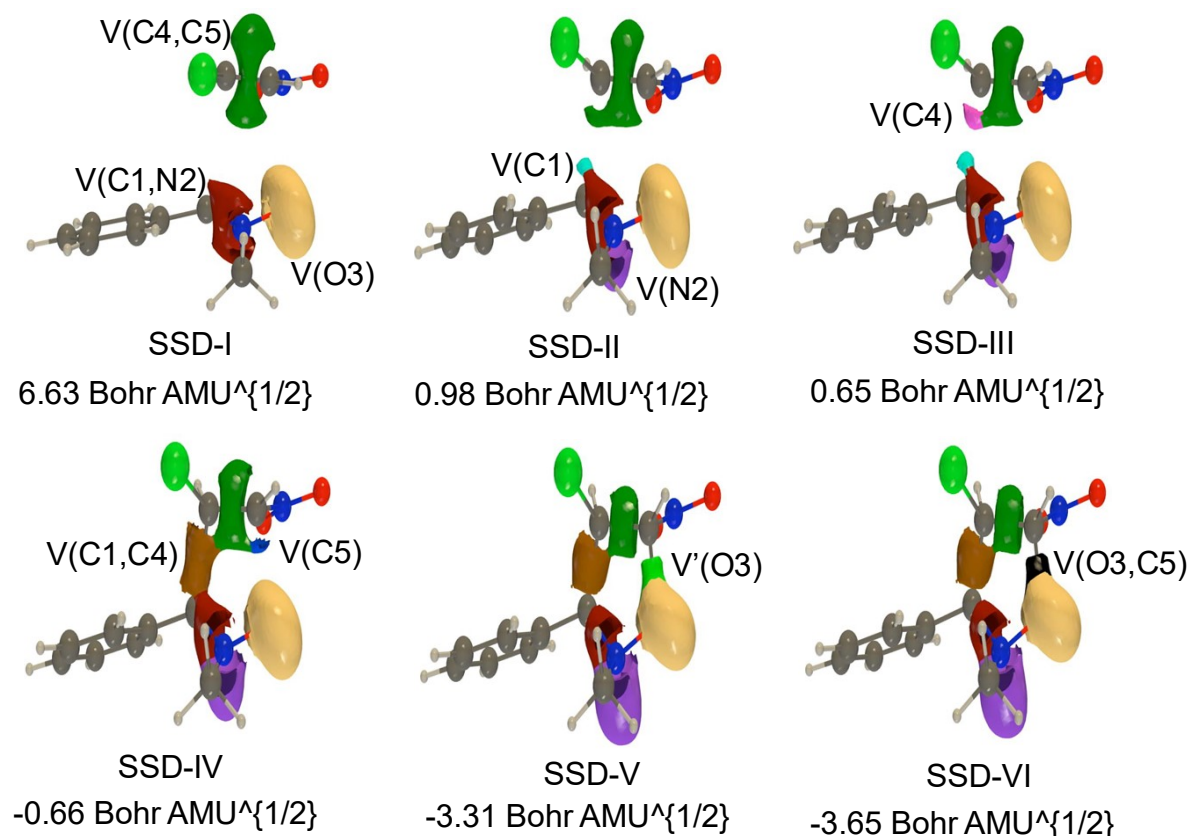

**Fig. S9** ELF basin isosurfaces ( $\eta = 0.70$ ) of each of the SSDs found along the IRC associated with **TS-mn**. Color labeling of the basins is adopted according to **Fig. S8**.



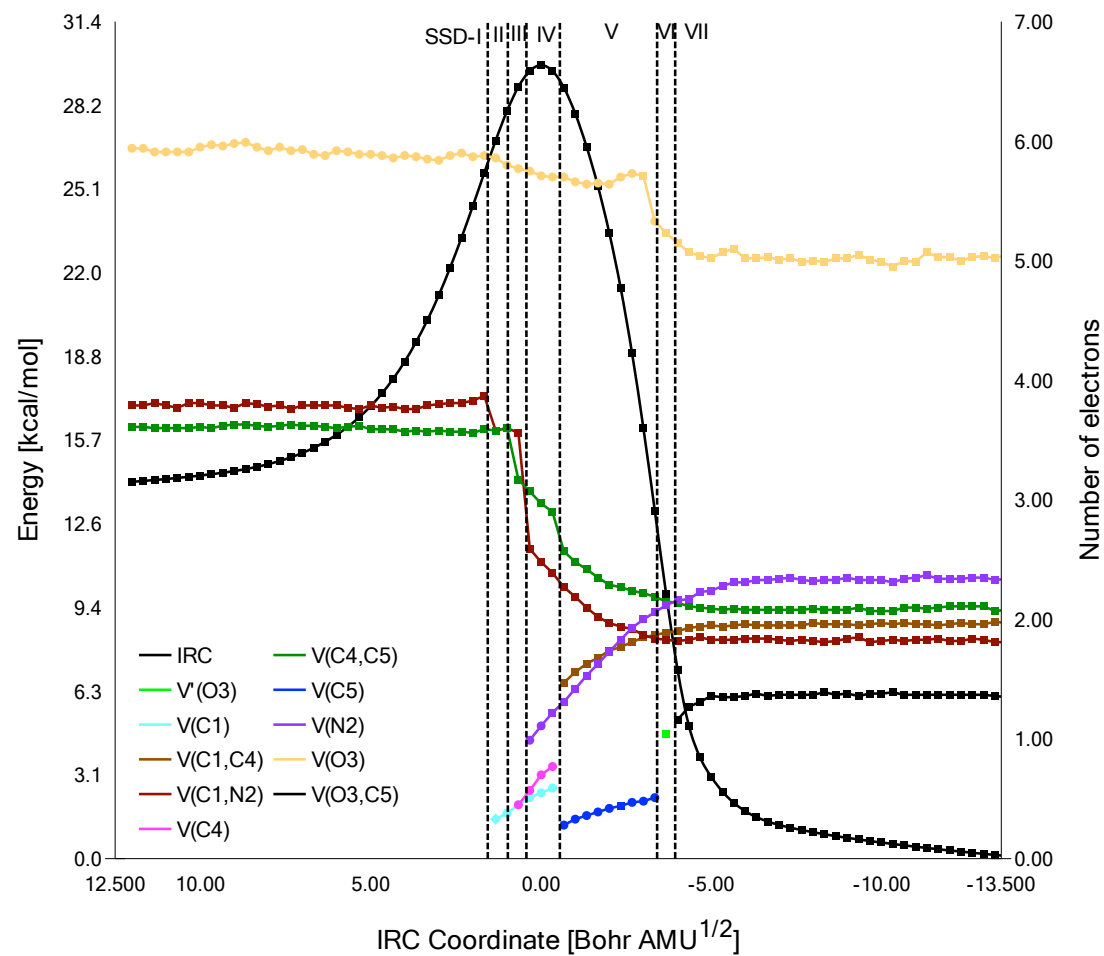

**Fig. S10** Electron populations (e) evolution for selected basins along the IRC associated with the **TS-mx** regio-isomeric channel as determined at the IEFPCM(benzene)/B3LYP/6-311G(d,p) level of approximation. These evolutions are plotted on top of the potential energy surface.

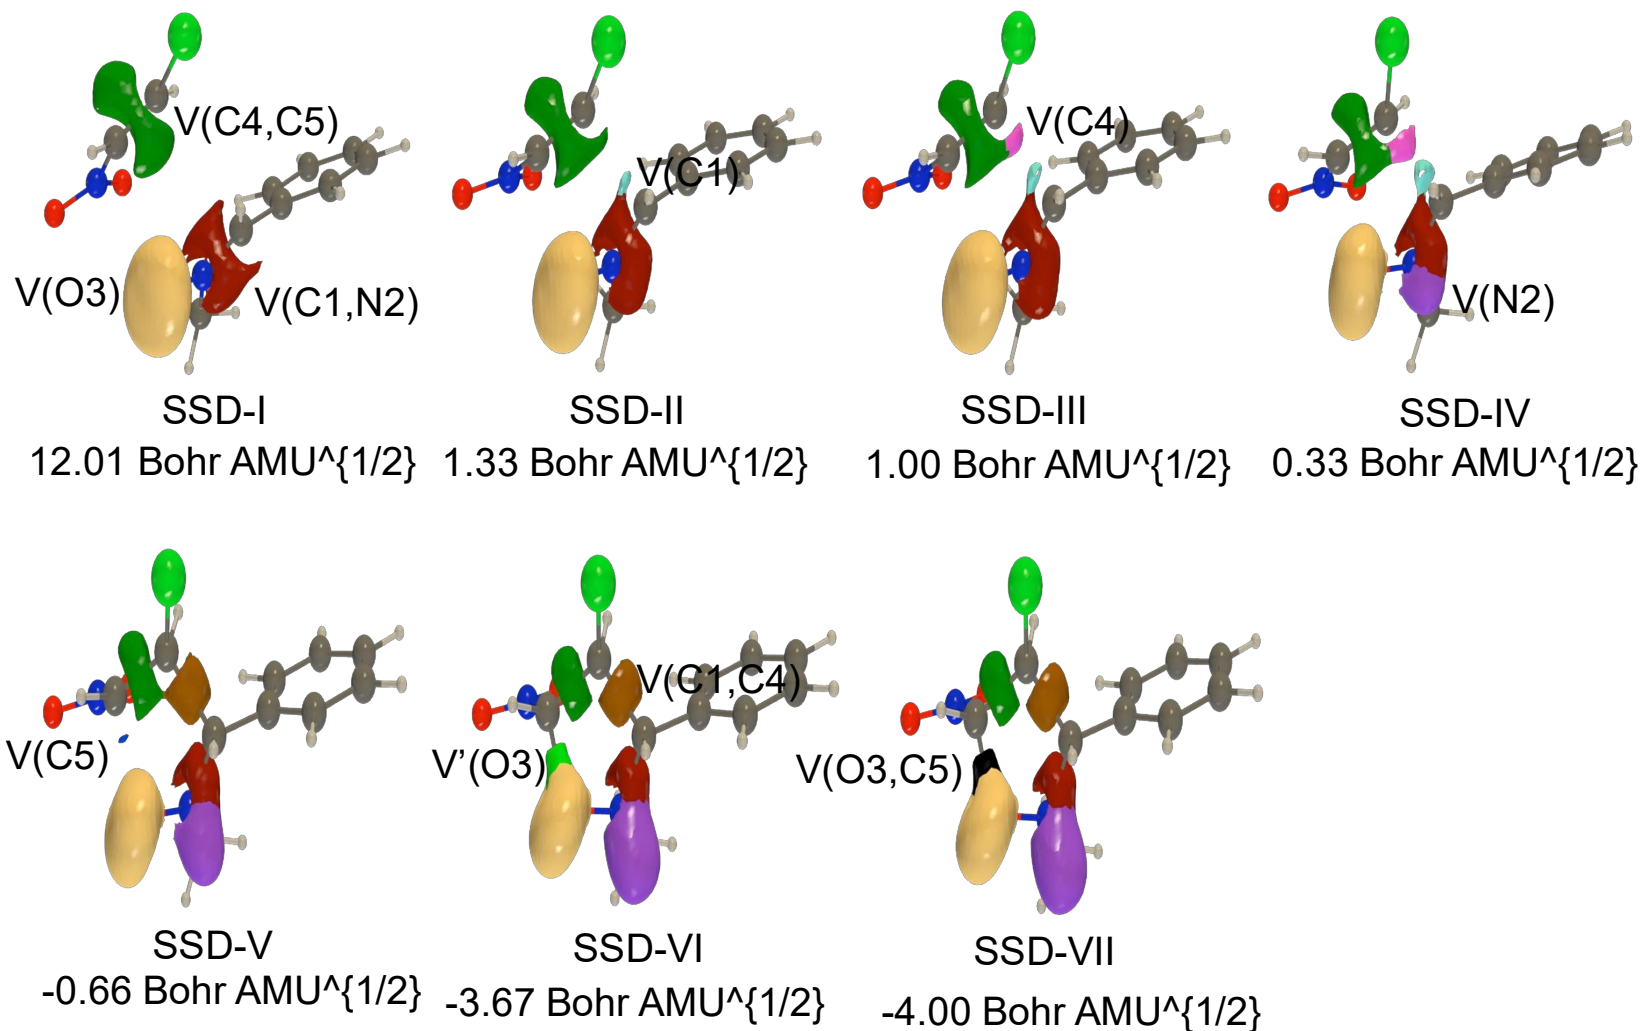

**Fig. S11** ELF basin isosurfaces ( $\eta = 0.70$ ) of each of the SSDs found along the IRC associated with **TS-mx**. Color labeling of the basins is adopted according to **Fig. S10**.

**Table S7** Basin populations (in e), IRC coordinates (RX, Bohr AMU<sup>1/2</sup>), relative electronic energies ( $\Delta E$  in kcal/mol) and C1-C5/O3-C4 bond lengths (in Å) along the **TS-on** regio-isomeric channel of 32CA reaction.

|          | SSD-I |       | SSD-II |       | SSD-III |       | SSD-IV |       | SSD-V |       | SSD-VI |       | SSD-VII |       |
|----------|-------|-------|--------|-------|---------|-------|--------|-------|-------|-------|--------|-------|---------|-------|
| Basins   | First | Last  | First  | Last  | First   | Last  | First  | Last  | First | Last  | First  | Last  | First   | Last  |
| V(C1,N2) | 3.76  | 3.95  | 3.97   | 3.97  | 3.08    | 2.90  | 2.84   | 2.84  | 2.80  | 2.57  | 2.42   | 2.29  | 2.22    | 1.86  |
| V(C4,C5) | 3.60  | 3.59  | 3.20   | 3.20  | 2.94    | 2.76  | 2.65   | 2.65  | 2.53  | 2.30  | 2.29   | 2.25  | 2.21    | 2.09  |
| V(O3)    | 5.99  | 5.84  | 5.88   | 5.88  | 5.85    | 5.92  | 5.42   | 5.42  | 5.23  | 5.10  | 5.09   | 5.02  | 5.04    | 4.96  |
| V(N2)    | ---   | ---   | ---    | ---   | 0.94    | 1.20  | 1.30   | 1.30  | 1.40  | 1.67  | 1.75   | 1.90  | 1.97    | 2.30  |
| V(C1)    | ---   | ---   | ---    | ---   | ---     | ---   | ---    | ---   | ---   | ---   | 0.21   | 0.34  | ---     | ---   |
| V(C4)    | ---   | ---   | ---    | ---   | 0.19    | 0.19  | ---    | ---   | ---   | ---   | ---    | ---   | ---     | ---   |
| V(C1,C5) | ---   | ---   | ---    | ---   | ---     | ---   | ---    | ---   | ---   | ---   | ---    | ---   | 1.39    | 1.88  |
| V(C5)    | ---   | ---   | 0.42   | 0.42  | 0.49    | 0.60  | 0.63   | 0.63  | 0.69  | 0.84  | 0.87   | 0.95  | ---     | ---   |
| V'(O3)   | ---   | ---   | ---    | ---   | ---     | ---   | 0.73   | 0.73  | ---   | ---   | ---    | ---   | ---     | ---   |
| V(O3,C4) | ---   | ---   | ---    | ---   | ---     | ---   | ---    | ---   | 0.90  | 1.14  | 1.19   | 1.23  | 1.26    | 1.41  |
| d(C1,C5) | 3.177 | 2.648 | 2.618  | 2.618 | 2.583   | 2.494 | 2.472  | 2.472 | 2.453 | 2.294 | 2.233  | 2.107 | 2.043   | 1.532 |
| d(O3,C4) | 2.643 | 1.913 | 1.852  | 1.852 | 1.794   | 1.732 | 1.670  | 1.670 | 1.606 | 1.502 | 1.487  | 1.463 | 1.452   | 1.390 |
| RX       | 6.89  | 1.29  | 0.95   | 0.95  | 0.59    | 0.00  | -0.34  | -0.34 | -0.68 | -1.72 | -2.07  | -2.77 | -3.12   | -6.97 |
| E        | 13.46 | 21.35 | 21.93  | 21.93 | 22.31   | 22.64 | 22.35  | 22.35 | 21.96 | 20.61 | 19.94  | 17.89 | 16.44   | 0.00  |

**Table S8** Basin populations (in e), IRC coordinates (RX, Bohr AMU<sup>1/2</sup>), relative electronic energies ( $\Delta E$  in kcal/mol) and C1-C5/O3-C4 bond lengths (in Å) along the **TS-ox** regio-isomeric channel of 32CA reaction.

|          | SSD-I  |       | SSD-II |       | SSD-III |       | SSD-IV |       | SSD-V |       | SSD-VI |       | SSD-VII |       | SSD-VIII |       |
|----------|--------|-------|--------|-------|---------|-------|--------|-------|-------|-------|--------|-------|---------|-------|----------|-------|
| Basins   | First  | Last  | First  | Last  | First   | Last  | First  | Last  | First | Last  | First  | Last  | First   | Last  | First    | Last  |
| V(C1,N2) | 3.79   | 3.90  | 3.94   | 3.96  | 3.99    | 3.99  | 3.05   | 2.96  | 2.88  | 2.88  | 2.84   | 2.77  | 2.51    | 2.38  | 2.31     | 1.86  |
| V(C4,C5) | 3.59   | 3.54  | 3.19   | 3.14  | 2.89    | 2.89  | 2.78   | 2.66  | 2.56  | 2.56  | 2.46   | 2.35  | 2.31    | 2.26  | 2.24     | 2.07  |
| V(O3)    | 5.96   | 5.89  | 5.88   | 5.92  | 5.83    | 5.83  | 5.84   | 6.06  | 5.27  | 5.27  | 5.25   | 5.15  | 5.11    | 5.10  | 5.10     | 5.05  |
| V(N2)    | ---    | ---   | ---    | ---   | ---     | ---   | 0.92   | 1.13  | 1.25  | 1.25  | 1.34   | 1.54  | 1.63    | 1.79  | 1.87     | 2.33  |
| V(C1)    | ---    | ---   | ---    | ---   | ---     | ---   | ---    | ---   | ---   | ---   | ---    | ---   | 0.26    | 0.37  | ---      | ---   |
| V(C4)    | ---    | ---   | ---    | ---   | 0.18    | 0.18  | 0.16   | 0.16  | ---   | ---   | ---    | ---   | ---     | ---   | ---      | ---   |
| V(C1,C5) | ---    | ---   | ---    | ---   | ---     | ---   | 1.39   | 1.88  | 1.39  | 1.39  | ---    | ---   | ---     | ---   | 1.39     | 1.88  |
| V(C5)    | ---    | ---   | 0.38   | 0.44  | 0.51    | 0.51  | 0.58   | 0.63  | 0.69  | 0.69  | 0.74   | 0.84  | 0.86    | 0.96  | ---      | ---   |
| V'(O3)   | ---    | ---   | ---    | ---   | ---     | ---   | ---    | ---   | 0.82  | 0.82  | ---    | ---   | ---     | ---   | ---      | ---   |
| V(O3,C4) | ---    | ---   | ---    | ---   | ---     | ---   | ---    | ---   | ---   | ---   | 0.88   | 1.01  | 1.05    | 1.14  | 1.16     | 1.32  |
| d(C1,C5) | 3.421  | 2.645 | 2.616  | 2.586 | 2.553   | 2.553 | 2.517  | 2.475 | 2.429 | 2.429 | 2.376  | 2.264 | 2.204   | 2.083 | 2.021    | 1.589 |
| d(O3,C4) | 2.748  | 1.954 | 1.897  | 1.841 | 1.796   | 1.796 | 1.753  | 1.696 | 1.644 | 1.644 | 1.611  | 1.561 | 1.542   | 1.510 | 1.496    | 1.413 |
| RX       | -10.96 | -1.99 | -1.66  | -1.33 | -0.99   | -0.99 | -0.66  | -0.33 | 0.00  | 0.00  | 0.33   | -0.99 | 1.33    | 1.99  | 2.32     | 6.96  |
| E        | 10.42  | 18.16 | 18.88  | 19.51 | 20.01   | 20.01 | 20.36  | 20.55 | 20.61 | 20.61 | 20.55  | 20.03 | 19.50   | 17.69 | 16.35    | 0.00  |

**Table S9** Basin populations (in e), IRC coordinates (RX, Bohr AMU<sup>1/2</sup>), relative electronic energies ( $\Delta E$  in kcal/mol) and C1-C4/O3-C5 bond lengths (in Å) along the **TS-mn** regio-isomeric channel of 32CA reaction.

|                 | SSD-I |       | SSD-II |       | SSD-III |       | SSD-IV |       | SSD-V |       | SSD-VI |       |
|-----------------|-------|-------|--------|-------|---------|-------|--------|-------|-------|-------|--------|-------|
| <b>Basins</b>   | First | Last  | First  | Last  | First   | Last  | First  | Last  | First | Last  | First  | Last  |
| <b>V(C1,N2)</b> | 3.76  | 3.94  | 2.87   | 2.87  | 2.62    | 2.24  | 2.15   | 1.90  | 1.87  | 1.87  | 1.86   | 1.87  |
| <b>V(C4,C5)</b> | 3.62  | 3.56  | 3.59   | 3.59  | 3.13    | 2.90  | 2.61   | 2.19  | 2.18  | 2.18  | 2.14   | 2.08  |
| <b>V(O3)</b>    | 5.93  | 5.84  | 5.79   | 5.79  | 5.76    | 5.72  | 5.71   | 5.37  | 5.34  | 5.34  | 5.26   | 5.09  |
| <b>V(N2)</b>    | ---   | ---   | 0.88   | 0.88  | 1.04    | 1.42  | 1.54   | 2.11  | 2.17  | 2.17  | 2.22   | 2.34  |
| <b>V(C1)</b>    | ---   | ---   | 0.33   | 0.33  | 0.41    | 0.56  | ---    | ---   | ---   | ---   | ---    | ---   |
| <b>V(C4)</b>    | ---   | ---   | ---    | ---   | 0.47    | 0.78  | ---    | ---   | ---   | ---   | ---    | ---   |
| <b>V(C1,C4)</b> | ---   | ---   | ---    | ---   | ---     | ---   | 1.43   | 1.86  | 1.89  | 1.89  | 1.91   | 1.97  |
| <b>V(C5)</b>    | ---   | ---   | ---    | ---   | ---     | ---   | 0.25   | 0.48  | ---   | ---   | ---    | ---   |
| <b>V'(O3)</b>   | ---   | ---   | ---    | ---   | ---     | ---   | ---    | ---   | 0.92  | 0.92  | ---    | ---   |
| <b>V(O3,C5)</b> | ---   | ---   | ---    | ---   | ---     | ---   | ---    | ---   | ---   | ---   | 1.05   | 1.36  |
| <b>d(C1,C4)</b> | 2.915 | 2.240 | 2.181  | 2.181 | 2.122   | 1.953 | 1.890  | 1.630 | 1.614 | 1.614 | 1.599  | 1.548 |
| <b>d(O3,C5)</b> | 2.659 | 2.221 | 2.188  | 2.188 | 2.154   | 2.053 | 2.027  | 1.677 | 1.617 | 1.617 | 1.557  | 1.402 |
| <b>RX</b>       | 6.36  | 1.32  | 0.99   | 0.99  | 0.65    | -0.33 | -0.66  | -2.98 | -3.31 | -3.31 | -3.64  | -6.60 |
| <b>E</b>        | 11.78 | 22.58 | 23.73  | 23.73 | 24.69   | 25.49 | 24.91  | 11.91 | 8.96  | 8.96  | 6.08   | 0.00  |

**Table S10** Basin populations (in e), IRC coordinates (RX, Bohr AMU<sup>1/2</sup>), relative electronic energies ( $\Delta E$  in kcal/mol) and C1-C4/O3-C5 bond lengths (in Å) along the **TS-mx** regio-isomeric channel of 32CA reaction.

|          | SSD-I |       | SSD-II |       | SSD-III |       | SSD-IV |       | SSD-V |       | SSD-VI |       | SSD-VII |        |
|----------|-------|-------|--------|-------|---------|-------|--------|-------|-------|-------|--------|-------|---------|--------|
| Basins   | First | Last  | First  | Last  | First   | Last  | First  | Last  | First | Last  | First  | Last  | First   | Last   |
| V(C1,N2) | 3.79  | 3.87  | 3.58   | 3.58  | 3.60    | 3.56  | 2.59   | 2.39  | 2.27  | 1.84  | 1.83   | 1.83  | 1.82    | 1.81   |
| V(C4,C5) | 3.61  | 3.59  | 3.58   | 3.58  | 3.60    | 3.17  | 3.07   | 2.90  | 2.57  | 2.19  | 2.15   | 2.15  | 2.14    | 2.07   |
| V(O3)    | 5.94  | 5.88  | 5.86   | 5.86  | 5.80    | 5.77  | 5.75   | 5.70  | 5.70  | 5.71  | 5.23   | 5.23  | 5.15    | 5.02   |
| V(N2)    | ---   | ---   | ---    | ---   | ---     | ---   | 0.99   | 1.22  | 1.31  | 2.06  | 2.12   | 2.12  | 2.16    | 2.33   |
| V(C1)    | ---   | ---   | 0.33   | 0.38  | 0.45    | 0.45  | 0.51   | 0.59  | ---   | ---   | ---    | ---   | ---     | ---    |
| V(C4)    | ---   | ---   | ---    | ---   | 0.45    | 0.45  | 0.57   | 0.77  | ---   | ---   | ---    | ---   | ---     | ---    |
| V(C1,C4) | ---   | ---   | ---    | ---   | ---     | ---   | ---    | ---   | 1.47  | 1.87  | 1.89   | 1.89  | 1.90    | 1.98   |
| V(C5)    | ---   | ---   | ---    | ---   | ---     | ---   | ---    | ---   | 0.28  | 0.51  | ---    | ---   | ---     | ---    |
| V'(O3)   | ---   | ---   | ---    | ---   | ---     | ---   | ---    | ---   | ---   | ---   | 1.04   | 1.04  | ---     | ---    |
| V(O3,C5) | ---   | ---   | ---    | ---   | ---     | ---   | ---    | ---   | ---   | ---   | ---    | ---   | 1.16    | 1.36   |
| d(C1,C4) | 3.211 | 2.294 | 2.235  | 2.235 | 2.174   | 2.113 | 2.052  | 1.932 | 1.875 | 1.622 | 1.668  | 1.594 | 1.578   | 1.545  |
| d(O3,C4) | 2.877 | 2.282 | 2.250  | 2.250 | 2.220   | 2.190 | 2.159  | 2.095 | 2.058 | 1.627 | 1.566  | 1.566 | 1.566   | 1.401  |
| RX       | 12.01 | 1.67  | 1.33   | 1.33  | 1.00    | 0.67  | 0.33   | -0.33 | -0.66 | -3.33 | -3.67  | -4.00 | -4.00   | -13.32 |
| E        | 14.12 | 25.70 | 26.92  | 26.92 | 28.03   | 28.93 | 29.53  | 29.53 | 28.90 | 13.04 | 9.90   | 7.08  | 7.03    | 0.00   |

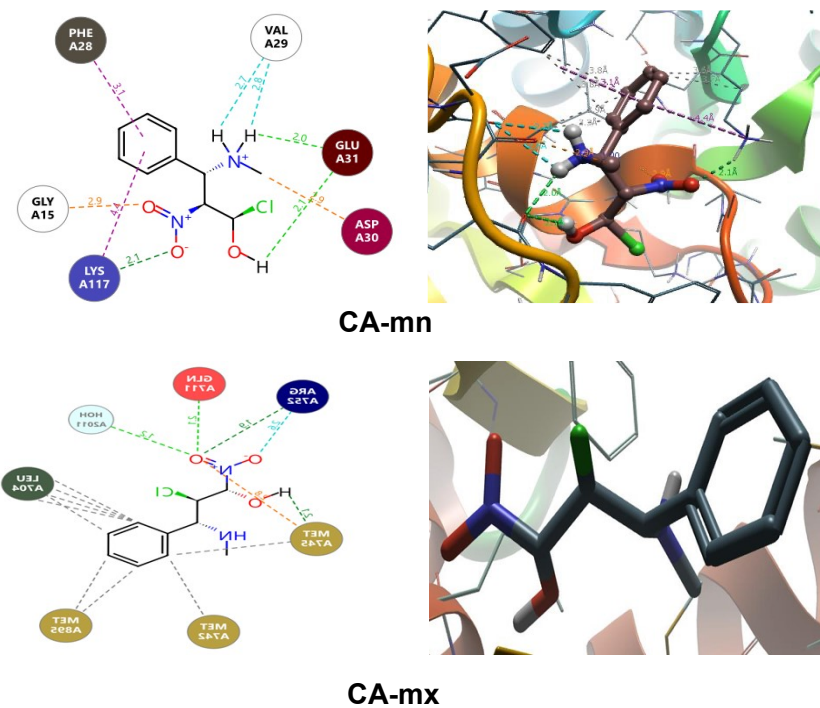

**Fig. S12** 2D and 3D visualization of the superimposed docking pose representation of binding interactions of **CA-mn**, and **CA-mx** compounds against HCT-116 (PDB ID: 4DSN).

**Table S11** Binding affinity (kcal mol<sup>-1</sup>) and nonbonding interactions of HCT-116 and compounds (**CA-ox**, **CA-on**, **CA-mn** and **CA-mx**).

| Complex                       | Binding affinity (kcal mol <sup>-1</sup> ) | Amino acid | Bond Type     | Interaction                | Distance (Å) |
|-------------------------------|--------------------------------------------|------------|---------------|----------------------------|--------------|
| <b>Co-crystallized ligand</b> | -13.095                                    |            |               |                            |              |
| <b>CA-ox</b>                  |                                            | PHE28      | Hydrophobic   | Pi-Pi T-shaped             | 4.98628      |
|                               |                                            | ALA146     | Hydrophobic   | Pi-Alkyl                   | 5.11269      |
|                               |                                            | ALA18      | Hydrophobic   | Pi-Alkyl                   | 4.54263      |
|                               |                                            | VAL29      | Hydrogen Bond | Conventional Hydrogen Bond | 2.69587      |
|                               |                                            | VAL29      | Hydrogen Bond | Conventional Hydrogen Bond | 2.84979      |
|                               |                                            | GLU31      | Hydrogen Bond | Conventional Hydrogen Bond | 2.14789      |
|                               |                                            | GLU31      | Hydrogen Bond | Conventional Hydrogen Bond | 2.02953      |
|                               |                                            | GLY15      | Hydrogen Bond | Carbon Hydrogen Bond       | 2.29161      |
|                               |                                            | ASN116     | Hydrogen Bond | Carbon Hydrogen Bond       | 2.46196      |
|                               |                                            | ASN116     | Hydrogen Bond | Carbon Hydrogen Bond       | 2.68824      |
| <b>CA-on</b>                  | -10.606                                    | TYR32      | Hydrophobic   | Pi-Pi T-shaped             | 5.24707      |
|                               |                                            | ALA18      | Hydrophobic   | Pi-Alkyl                   | 4.83626      |
|                               |                                            | THR35      | Hydrogen Bond | Carbon Hydrogen Bond       | 3.09283      |
|                               |                                            | GLY31      | Hydrogen Bond | Conventional Hydrogen Bond | 2.02026      |
|                               |                                            | SER17      | Hydrogen Bond | Carbon Hydrogen Bond       | 2.42552      |
|                               |                                            | MG202      | Electrostatic | Attractive Charge          | 2.34779      |
|                               |                                            | ASP33      | Hydrogen Bond | Carbon Hydrogen Bond       | 2.7383       |



|       |         |               |                            |         |
|-------|---------|---------------|----------------------------|---------|
| CA-mn | ALA18   | Hydrophobic   | Pi-Alkyl                   | 4.85427 |
|       | GLUA62  | Hydrogen Bond | Conventional Hydrogen Bond | 2.52329 |
|       | ASPA33  | Hydrogen Bond | Carbon Hydrogen Bond       | 2.39761 |
|       | SERA17  | Hydrogen Bond | Conventional Hydrogen Bond | 1.82727 |
|       | SERA17  | Hydrogen Bond | Carbon Hydrogen Bond       | 2.93186 |
|       | MG202   | Electrostatic | Attractive Charge          | 3.81783 |
|       | LYSA16  | Electrostatic | Attractive Charge          | 1.93392 |
|       | LYSA16  | Hydrogen Bond | Conventional Hydrogen Bond | 2.75855 |
|       | LYSA16  | Hydrogen Bond | Conventional Hydrogen Bond | 2.08189 |
|       | VALA14  | Hydrogen Bond | Conventional Hydrogen Bond | 2.77277 |
|       | GLYA13  | Hydrogen Bond | Conventional Hydrogen Bond | 2.1198  |
|       | GLY A15 | Hydrogen Bond | Conventional Hydrogen Bond | 2.04789 |
|       | GLN A99 | Hydrophobic   | Pi-Alkyl                   | 5.19839 |
| CA-mx | GLYA13  | Halogen       | Halogen (Cl, Br, I)        | 3.35043 |
|       | GLUA31  | Hydrogen Bond | Conventional Hydrogen Bond | 2.02111 |
|       | MG202   | Electrostatic | Attractive Charge          | 2.47918 |
|       | MG202   | Other         | Metal-Acceptor             | 2.56646 |
|       | ASPA33  | Hydrogen Bond | Conventional Hydrogen Bond | 2.48819 |
|       | LYSA16  | Electrostatic | Attractive Charge          | 4.21553 |
|       | LYSA16  | Hydrogen Bond | Conventional Hydrogen Bond | 2.95919 |
|       | SERA17  | Hydrogen Bond | Conventional Hydrogen Bond | 1.96692 |
|       | SERA17  | Hydrogen Bond | Carbon Hydrogen Bond       | 2.81159 |
|       | SERA17  | Hydrogen Bond | Carbon Hydrogen Bond       | 2.84992 |

*H = Conventional hydrogen bond; C = Carbon hydrogen bond; A = Alkyl; PA = Pi-alkyl; PCa = Pi-cation; PS = Pi-sigma; PPT = Pi-Pi T-shaped; PDH = Pi-donor hydrogen bond; APS = Amide Pi-stacked.*

**Table S12** Drug-likeness predictions of compounds (**CA-ox**, **CA-on**, **CA-mn** and **CA-mx**), computed by SwissADME.

| Compounds    | Mol. Wt.<br>(g/mol) | NHD | NHA | NRB | TPSA (Å <sup>2</sup> ) | Log P<br>(iLOGP)<br>lipophilicity | Log S<br>(ESOL)<br>water<br>solubility | Synthetic<br>accessibility | Lipinski's<br>rule of five<br>with zero<br>violations |
|--------------|---------------------|-----|-----|-----|------------------------|-----------------------------------|----------------------------------------|----------------------------|-------------------------------------------------------|
| <b>CA-on</b> | 242.66              | 0   | 4   | 2   | 58.29                  | 1.90                              | -2.88                                  | 3.61                       | 0                                                     |
| <b>CA-ox</b> | 242.66              | 0   | 4   | 2   | 58.29                  | 1.90                              | -2.88                                  | 3.61                       | 0                                                     |
| <b>CA-mn</b> | 242.66              | 0   | 4   | 2   | 58.29                  | 1.69                              | -2.88                                  | 3.72                       | 0                                                     |
| <b>CA-mx</b> | 242.66              | 0   | 4   | 2   | 58.29                  | 1.90                              | -2.88                                  | 3.72                       | 0                                                     |

*Abbreviations: NHD, number of hydrogen donors; NHA, number of hydrogen acceptors; NRB, number of rotatable bonds; TPSA, total polar surface area.*

**Table S13** ADMET/pharmacokinetic features of the best-hit compounds.

| Property                   | Value  |        |        |        | Comment                                                                                                                                                                                              |
|----------------------------|--------|--------|--------|--------|------------------------------------------------------------------------------------------------------------------------------------------------------------------------------------------------------|
|                            | CA-on  | CA-mn  | CA-ox  | CA-mx  |                                                                                                                                                                                                      |
| <b>Caco-2 Permeability</b> | -4.742 | -4.545 | -4.688 | -4.656 | Optimal: higher than -5.15 Log unit<br>■ low permeability: $< 2 \times 10^{-6}$ cm/s<br>■ medium permeability: $2-20 \times 10^{-6}$ cm/s<br>■ high passive permeability: $> 20 \times 10^{-6}$ cm/s |
| <b>MDCK Permeability</b>   | -4.216 | 4.097  | -4.223 | -4.096 | ■ low permeability: $< 2 \times 10^{-6}$ cm/s<br>■ medium permeability: $2-20 \times 10^{-6}$ cm/s<br>■ high passive permeability: $> 20 \times 10^{-6}$ cm/s                                        |
| <b>HIA</b>                 | 0.0    | 0.0    | 0.0    | 0.0    | ■ Human Intestinal Absorption<br>■ Category 1: HIA+ (HIA $< 30\%$ );<br>■ Category 0: HIA- (HIA $\geq 30\%$ );<br>■ The output value is the probability of being HIA+                                |
| <b>F20%</b>                | 0.001  | 0.003  | 0.004  | 0.003  | ■ 20% Bioavailability<br>■ Category 1: F 20% + (bioavailability $< 20\%$ );<br>■ Category 0: F 20% - (bioavailability $\geq 20\%$ );<br>■ The output value is the probability of being F 20%         |
| <b>F30%</b>                | 0.004  | 0.022  | 0.018  | 0.012  | ■ 30% Bioavailability<br>■ Category 1: F 30% + (bioavailability $< 30\%$ );<br>■ Category 0: F 30% - (bioavailability $\geq 30\%$ );<br>■ The output value is the probability of being F 30% +       |

**Table S14** ADME predictions of compounds (**CA-ox**, **CA-on**, **CA-mn** and **CA-mx**), computed by SwissADME and PreADMET.

| S.No.        | Formula                                                         | Skin<br>Permeation<br>value<br>(log Kp)<br>cm/s | GI<br>absorption | BBB<br>Permeability | Pgp<br>substrate | Inhibitor Interaction (SwissADME/PreADMET) |                      |                     |                     |                  |
|--------------|-----------------------------------------------------------------|-------------------------------------------------|------------------|---------------------|------------------|--------------------------------------------|----------------------|---------------------|---------------------|------------------|
|              |                                                                 |                                                 |                  |                     |                  | CYP1<br>A2<br>inhibitor                    | CYP2C19<br>inhibitor | CYP2C9<br>inhibitor | CYP2D6<br>inhibitor | CYP3A4 inhibitor |
| <b>CA-ox</b> | C <sub>10</sub> H <sub>11</sub> ClN <sub>2</sub> O <sub>3</sub> | -6.22                                           | High             | Yes                 | No               | No                                         | No                   | No                  | No                  | No               |
| <b>CA-on</b> | C <sub>10</sub> H <sub>11</sub> ClN <sub>2</sub> O <sub>3</sub> | -6.22                                           | High             | Yes                 | No               | No                                         | No                   | No                  | No                  | No               |
| <b>CA-mn</b> | C <sub>10</sub> H <sub>11</sub> ClN <sub>2</sub> O <sub>3</sub> | -6.22                                           | High             | Yes                 | No               | No                                         | No                   | No                  | No                  | No               |
| <b>CA-mx</b> | C <sub>10</sub> H <sub>11</sub> ClN <sub>2</sub> O <sub>3</sub> | -6.22                                           | High             | Yes                 | No               | No                                         | No                   | No                  | No                  | No               |

Abbreviations: Log Kp, skin permeation value; GI, gastro-intestinal; BBB, blood-brain barrier; P-gp, P-glycoprotein; CYP, cytochrome-P.

**Table S15** Prediction of toxicity of compounds (**CA-ox**, **CA-on**, **CA-mn** and **CA-mx**), computed by Pro-Tox II and OSIRIS property explorer

| S.No.        | Formula                                                         | LD <sub>50</sub> (mg/kg) | Toxicity class | Organ Toxicity |                 |                |              |              |          |
|--------------|-----------------------------------------------------------------|--------------------------|----------------|----------------|-----------------|----------------|--------------|--------------|----------|
|              |                                                                 |                          |                | Hepatotoxicity | Carcinogenicity | Immunotoxicity | Mutagenicity | Cytotoxicity | Irritant |
| <b>CA-ox</b> | C <sub>10</sub> H <sub>11</sub> ClN <sub>2</sub> O <sub>3</sub> | 1000                     | 4              | Active         | Active          | Inactive       | Active       | Inactive     | No       |
| <b>CA-on</b> | C <sub>10</sub> H <sub>11</sub> ClN <sub>2</sub> O <sub>3</sub> | 1000                     | 4              | Active         | Active          | Inactive       | Active       | Inactive     | No       |
| <b>CA-mn</b> | C <sub>10</sub> H <sub>11</sub> ClN <sub>2</sub> O <sub>3</sub> | 1000                     | 4              | Active         | Active          | Inactive       | Active       | Inactive     | No       |
| <b>CA-mx</b> | C <sub>10</sub> H <sub>11</sub> ClN <sub>2</sub> O <sub>3</sub> | 1000                     | 4              | Active         | Active          | Inactive       | Active       | Inactive     | No       |
